# Supplementary material
Source: Springer Nature journal article supplement (https://www.springermedizin.de/resource/supplementary/12960_2011_318_MOESM3_ESM.pdf/9569756)

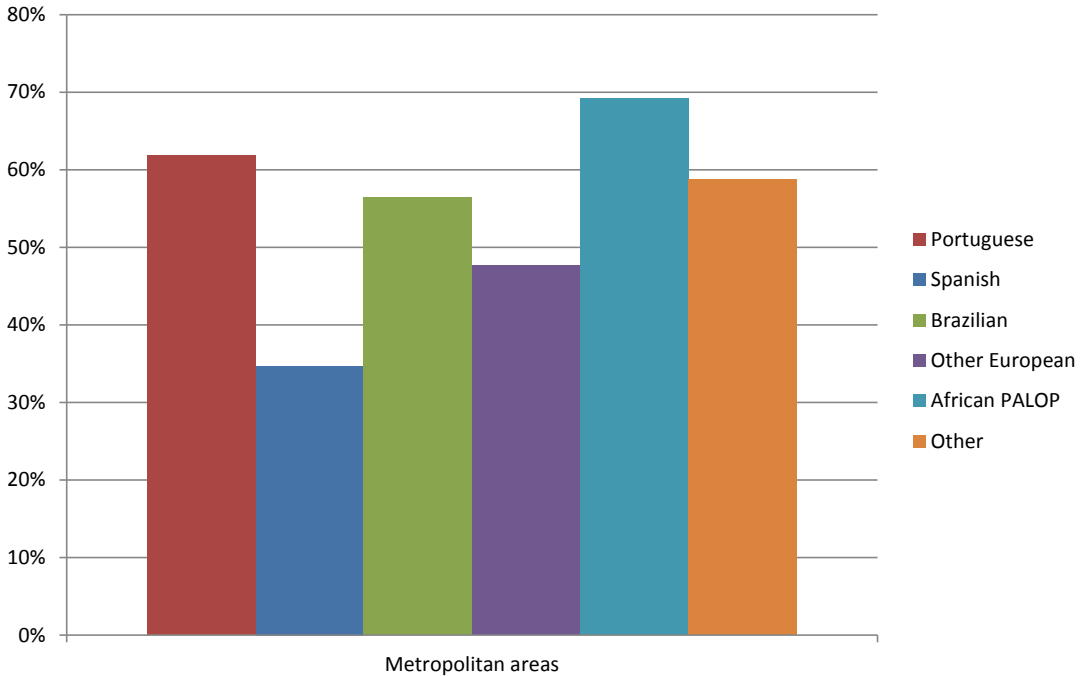

Supplement: MOESM3 [file 9569756]
